# Supplementary material for: Novel MnO/conjugated microporous polymer derived-porous hard carbon nanocomposite for superior lithium storage
Source: Royal Society of Chemistry journal article supplement (doi:10.1039/c4ra05339g), 2014-01-01
Supplement: c4ra05339g1.pdf [file c4ra05339g1.pdf]

## Supporting Information

*Qingtang Zhang, Songwang Ge, Xiaomei Wang, Hanxue Sun, Zhaoqi Zhu, Weidong Liang and An Li\**

*School of Petrochemical Engineering, Lanzhou University of Technology*

CMP were synthesized from 1,3,5-triethynylbenzene using Pd(II)/Cu(I)-catalyzed homocoupling polymerization. CMP were calcined at 400 °C for 2 h, then kept at 700 °C for 4 h to obtain the porous hard carbon (PHC). The morphology of PHC was examined by field-emission scanning electron microscope (FSEM). It was shown in Fig. S1. PHC-1 has a relatively small and homogeneous particle size of ca. 30-70 nm.

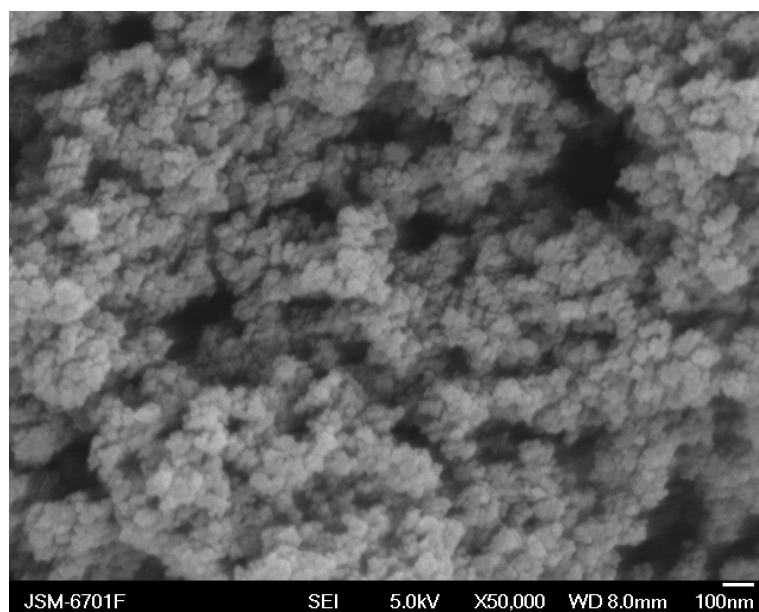

Fig. S1 SEM image of PHC.

The porous properties of the PHC were evaluated by nitrogen adsorption analyses at 77 K. It display a representative type IV isotherm as illustrated in Fig. S2a. The pore volume was estimated from the amount of nitrogen adsorbed at a relative pressure of  $P/P_0 = 0.99$  and that of PHC is  $0.77 \text{ cm}^3 \text{ g}^{-1}$ . The PHC prepared under our experimental conditions exhibit a BET surface area of  $575.0 \text{ m}^2 \text{ g}^{-1}$ . PHC has a micro pore area of  $189.4 \text{ m}^2 \text{ g}^{-1}$  and a external surface area of  $385.6 \text{ m}^2 \text{ g}^{-1}$ . PHC has a wider pore size distribution and larger pore area of pore size about 3 nm, 9 nm and 50

nm as illustrated in Fig. S2b.

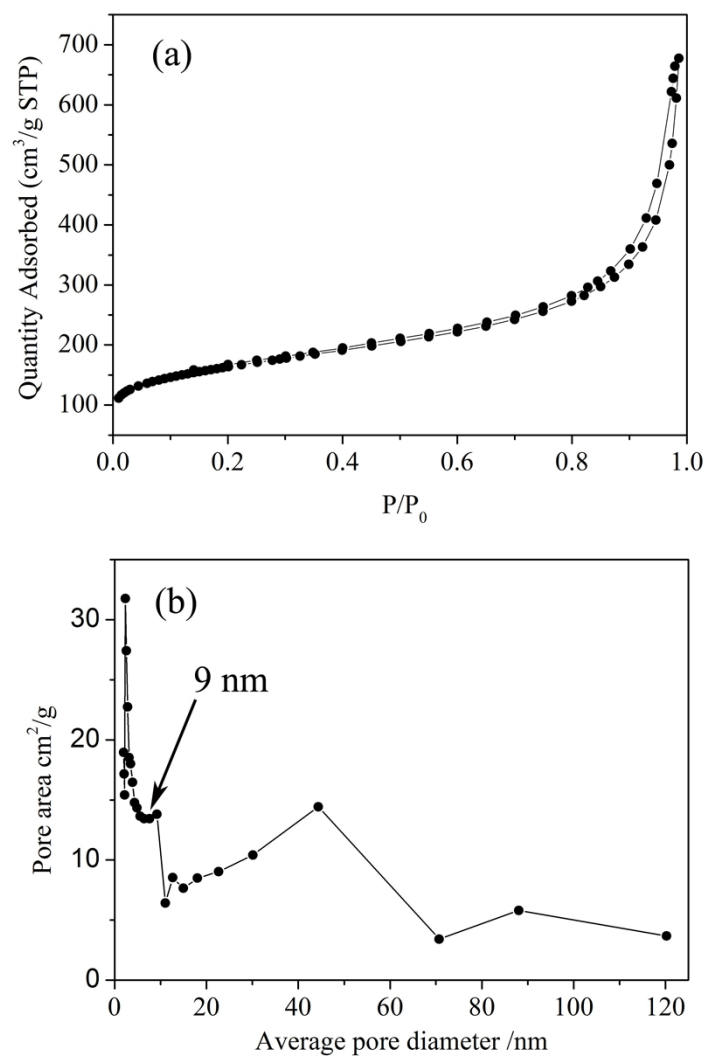

Fig. S2 nitrogen adsorption-desorption isotherms of PHC. (STP: standard temperature and pressure). b) pore size distribution of PHC.
